# Supplementary material for: Peripheral blood stem and progenitor cell collection in pediatric candidates for ex vivo gene therapy: a 10-year series
Source: PubMed Central journal article supplement — Mol Ther Methods Clin Dev. 2021 Jun 1;22:76–83. doi: 10.1016/j.omtm.2021.05.013 (PMC8390560; doi:10.1016/j.omtm.2021.05.013), 2021-06-01
Supplement: mmc1.pdf [file mmc1.pdf]

## **Supplemental information**

### **Peripheral blood stem and progenitor cell collection in pediatric candidates for *ex vivo* gene therapy: a 10-year series**

**Daniele Canarutto, Francesca Tucci, Salvatore Gattillo, Matilde Zambelli, Valeria Calbi, Bernhard Gentner, Francesca Ferrua, Sarah Markt, Maddalena Migliavacca, Federica Barzagli, Giulia Consiglieri, Vera Gallo, Francesca Fumagalli, Paola Massariello, Cristina Parisi, Gianluca Viarengo, Elena Albertazzi, Paolo Silvani, Raffaella Milani, Luca Santoleri, Fabio Ciceri, Maria Pia Cicalese, Maria Ester Bernardo, and Alessandro Aiuti**

## Supplementary methods

40/45 patients were enrolled upfront to collect cells for both drug product (DP) manufacturing and backup. 38/40 met this goal by PBSC collection alone, while 2 required an additional BM harvest. For 5/45 patients, mobilization and apheresis were done to overcome potential or actual limitations of bone marrow harvest. 2/45 were enrolled in the Strimvelis hospital exemption program, which allowed to manufacture the commercial DP from PBSCs due to low CD34<sup>+</sup> cell counts in the BM. 2/45 collected only for backup purpose; another one was enrolled for a rescue procedure to collect an additional quota of cells for the DP.

Conditioning regimens varied across disease-specific protocols. Except for ADA-SCID patients, that received low-dose busulfan (2 mg/kg per day divided into 4 doses of 0.5 mg/kg on days -3 and -2), and WAS patients that received non-myeloablative busulfan and fludarabine, all patients received a myeloablative conditioning. BTHAL patients received threosulfan and thiotepa regimen, MLD patients received busulfan, and MPS1 patients received fludarabine and busulfan. The DP was infused intravenously through a CVC except for B-thal patients that received an intrabone infusion.

Neutrophil engraftment was defined as the first of three consecutive days with  $\geq 500$  neutrophils/ $\mu\text{L}$ . Platelet engraftment was defined as the first of three consecutive days of platelet counts  $>20.000/\mu\text{L}$  7 days after the last platelet transfusion. For those that never reached platelet counts  $<20.000/\mu\text{L}$ , the day of platelet nadir was used instead.

### Supplementary Tables

Table S1: number of CD34<sup>+</sup> cells stored for backup, averaged by weight. Median values and (range) are reported.

| Disease                                               | ADA-SCID      | $\beta$ -thalassemia | MLD           | MPSIH         | WAS            |
|-------------------------------------------------------|---------------|----------------------|---------------|---------------|----------------|
| CD34 <sup>+</sup> cells x 10 <sup>6</sup> /kg (range) | 3.2 (1.2-5.0) | 5.1 (4.3-6.9)        | 4.4 (3.0-5.5) | 4.4 (3.7-6.8) | 3.7 (2.8-13.8) |

## Supplementary Figures

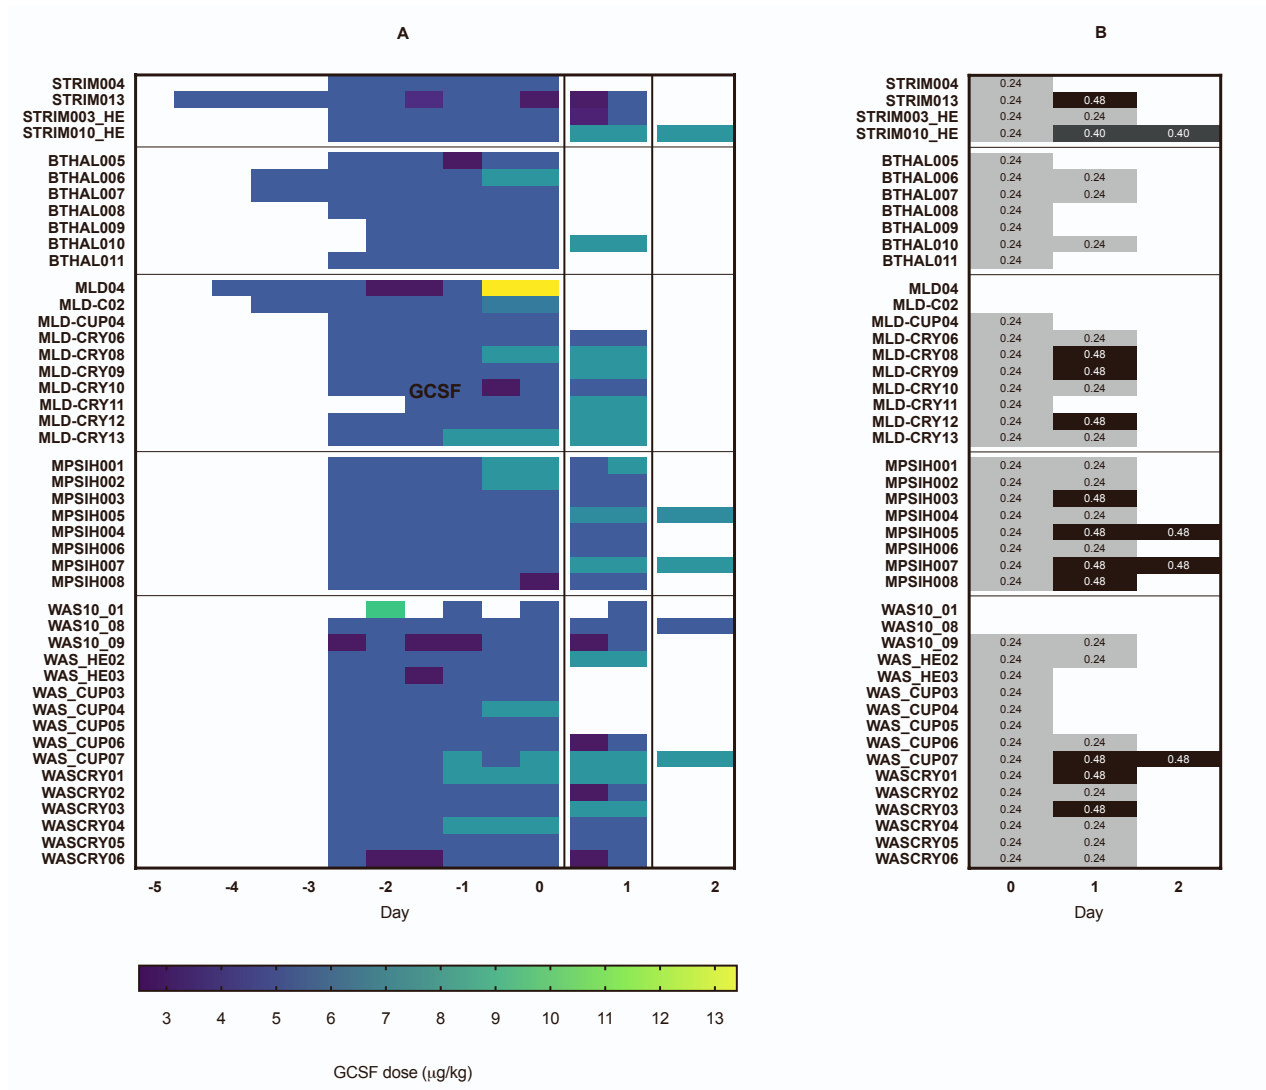

Figure S1 A: Heat map illustrating consecutive doses of lenograstim administered to each patient. Aphereses took place on Day 0, 1 and 2, corresponding to solid vertical lines. With a single exception (WAS10\_01), mobilization was started with lenograstim 5  $\mu\text{g}/\text{kg}$  twice daily and adjusted according to the peripheral WBC count, and continued until the morning before the last apheresis. WAS10\_01 received a once daily lenograstim regimen.

B: Heat map illustrating consecutive doses of plerixafor on corresponding days. Plerixafor was introduced in 2015, and systematically administered from the fifth patient onwards, at the dose of 0.24 mg/kg approximately 6 hours before each apheresis. Since 2018, the second and third dose of plerixafor have been adjusted up to a maximum of 0.48 mg/kg.

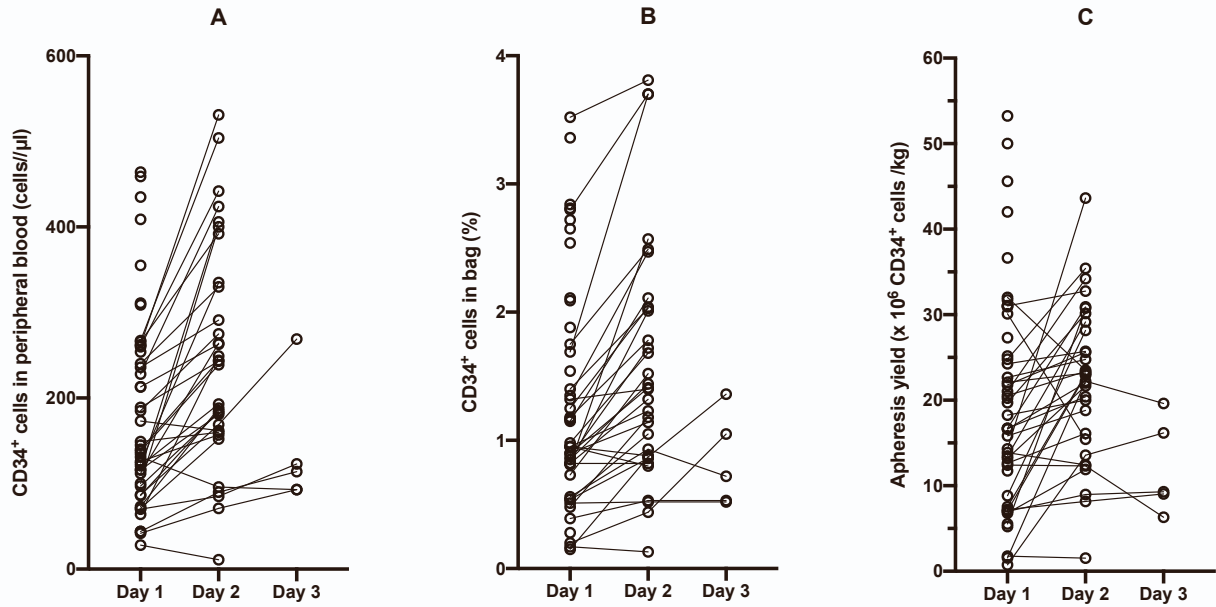

Figure S2: Dot plots illustrating the absolute number of CD34<sup>+</sup> cells in peripheral blood before the apheresis (A) and the corresponding relative CD34<sup>+</sup> content in the apheresis bag (B) and absolute CD34<sup>+</sup> cell yield averaged by weight (C). Lines connect values belonging to the same patient.

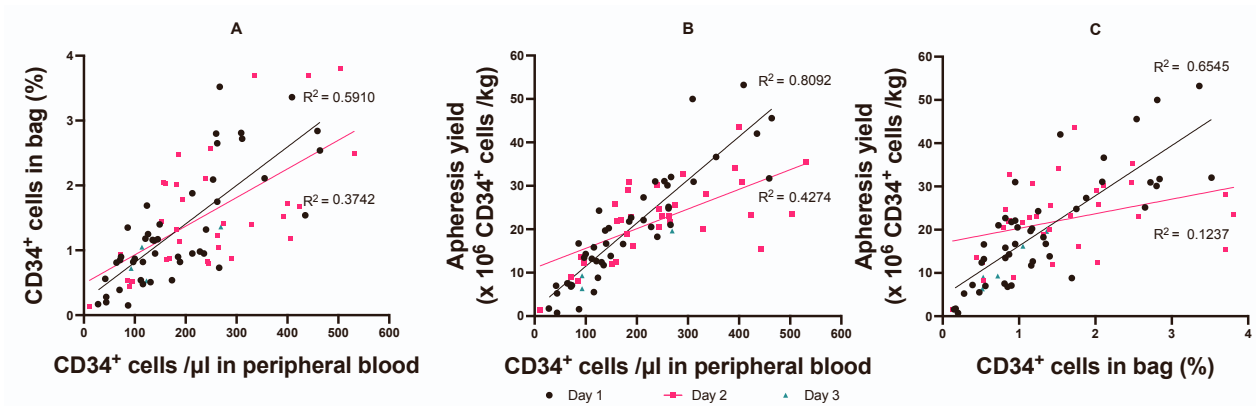

Figure S3: Dot plots illustrating the correlation between the CD34<sup>+</sup> cell counts in peripheral blood and relative CD34<sup>+</sup> counts in the apheresis bag (A), weight-adjusted CD34<sup>+</sup> yield (B) and between the latter two (C). Data points are coded according to the day of apheresis.
